# Supplementary material for: Effectiveness of action observation therapy based on virtual reality technology in the motor rehabilitation of paretic stroke patients: a randomized clinical trial
Source: Springer Nature journal article supplement (doi:10.1186/s12883-022-02640-2), 2022-03-22
Supplement: MOESM2 [file 20243912]

**Additional file 2.** Examples of exercises proposed for the rehabilitation treatment.

|     |                                                              |                                                                                       |
|-----|--------------------------------------------------------------|---------------------------------------------------------------------------------------|
| Ex. | <b>Week 1, simple movements</b>                              |                                                                                       |
| 1   | Lateral reaching movement                                    | 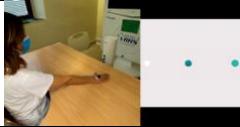   |
| 2   | Supination/pronation of the hand                             |    |
| 3   | Simple trajectory on the horizontal plane                    |    |
| 4   | Simple trajectory: draw a circle clockwise                   |    |
| Ex. | <b>Week 2, simple goal-directed actions</b>                  |                                                                                       |
| 1   | Grasping a glass and placing it on a shelf                   |   |
| 2   | Grasping a teapot and move it to the side                    |  |
| 3   | Insert the toothbrush in a glass                             |  |
| 4   | Move a book on the chairs with both hands                    |  |
| Ex. | <b>Week 3, antigravity movements</b>                         |                                                                                       |
| 1   | Grasping an object and moving it towards a target (top-down) |  |
| 2   | Draw a circle with large radius                              |  |
| 3   | Grasp an object and follow a curvilinear path                |  |
| 4   | Catch water drops with a virtual umbrella                    |  |

|     |                                                                          |                                                                                       |
|-----|--------------------------------------------------------------------------|---------------------------------------------------------------------------------------|
| Ex. | <b>Week 4, daily life actions (functional exercises)</b>                 |                                                                                       |
| 1   | Wearing glasses (bimanual)                                               |    |
| 2   | Draw a line with the ruler (bimanual)                                    |    |
| 3   | Put the toothpaste on the toothbrush (bimanual)                          |    |
| 4   | Use knife and fork (bimanual)                                            |    |
| Ex. | <b>Week 5, complex action sequences with visuospatial components</b>     |                                                                                       |
| 1   | Copy a drawing using a graspable pad                                     |    |
| 2   | Link the points displayed on the screen in the correct order             |   |
| 3   | Obstacle avoidance: move a ball to the finish without touching the walls |  |
| 4   | Move a ball through the path without leaving it                          |  |
