# Supplementary material for: Effectiveness of action observation therapy based on virtual reality technology in the motor rehabilitation of paretic stroke patients: a randomized clinical trial
Source: Springer Nature journal article supplement (doi:10.1186/s12883-022-02640-2), 2022-03-22
Supplement: MOESM3 [file 20243912]

### Additional file 3. Informed consent form

**Title of the trial: "Effectiveness of Action Observation Therapy based on Virtual Reality technology in motor rehabilitation of paretic stroke patients: a randomized clinical trial".**

**Promoter:** University Hospital of Parma, Italy

**Sponsor:** Italian Ministry of Health (MOH) (Project Code: SG-2019-12370506)

**Principal Investigator Name and contact information** \_\_\_\_\_

Patient name \_\_\_\_\_

Date of birth and Place \_\_\_\_\_/\_\_\_\_/\_\_\_\_\_

- I received from Dr. \_\_\_\_\_ exhaustive explanations about the research question, as reported in the informative form;
- I understood the aims, procedures, expected benefits, risks and alternative treatments to the proposed intervention;
- I had the opportunity to ask any question to the principal investigator and I received satisfactory answers;
- I had enough time to reflect on the received information concerning the study;
- I had sufficient time to discuss with others (family, friends etc.) about my participation in the study;
- I am aware that the trial protocol and all the forms used have been approved by the Ethics Committee;
- I know that the research can be interrupted at any time, by decision of the principal investigator;
- I am aware of the importance (and of my responsibility) of informing my family doctor about the trial in which I agree to participate;
- I have been informed that the results of the study will be communicated to the scientific community, protecting my identity in agreement with the privacy policy;
- I know that any choice expressed in this consent form can be revoked at any time and without any justification;
- I received a copy of this consent form;
- I agree to participate in the trial;
- YES  NOT I wish to be informed of any unexpected findings relating to my own health, which may accidentally result from this study

\_\_\_\_\_/\_\_\_\_/\_\_\_\_\_  
Patient's name Date Signature

\_\_\_\_\_/\_\_\_\_/\_\_\_\_\_  
Legal representant's Name Date Signature
